# Supplementary material
Source: Springer Nature journal article supplement (https://www.springermedizin.de/resource/supplementary/13045_2012_193_MOESM1_ESM.pdf/9660946)
Supplement: MOESM1 [file 9660946]

| Patient ID | Chromatogram                                                                       | Sequence                  | Nucleotide: amino acid change |
|------------|------------------------------------------------------------------------------------|---------------------------|-------------------------------|
| No.001     | 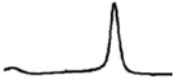  | ATAGGTC <b>CGT</b> CATGC  | WT: R132                      |
| No.002     |   | ATAGGTC <b>CGT</b> CATGC  | G>A: R132H                    |
| No.120     |   | ATAGGTC <b>CGT</b> CATGC  | C>T: R132C                    |
| No.108     |   | ATAGGTC <b>CGT</b> CATGC  | C>A: R132S                    |
| No.815     |   | ATAGGTC <b>CGT</b> CATGC  | C>G: R132G                    |
| No.073     |   | ATAGGTC <b>CGT</b> CATGC  | G>T: R132L                    |
| No.615     |   | GGCACC <b>A</b> TACGAAAT  | A>G: I99M                     |
| No.898     |   | CTGGGT <b>G</b> GTAACGGTC | SNP: G105G                    |
| No.262     |   | ACTAT <b>C</b> CGGAACATC  | G>A: R140Q                    |
| No.108     |  | ATTGG <b>C</b> AAGCACGCC  | G>A: R172K                    |
